# Supplementary material for: Co-circulation of Aedes flavivirus, Culex flavivirus, and Quang Binh virus in Shanghai, China
Source: PubMed Central journal article supplement (PMC6052644; doi:10.1186/s40249-018-0457-9), 2018-07-16
Supplement: 40249_2018_457_MOESM2_ESM.pdf [file 40249_2018_457_MOESM2_ESM.pdf]

**Additional Table.** Summary of the insect-specific flaviviruses documented in mainland China

| Detected virus | Collect date | Collect location            | Host                         | Strain          | GenBank ID |   |          | Reference                      |
|----------------|--------------|-----------------------------|------------------------------|-----------------|------------|---|----------|--------------------------------|
|                |              |                             |                              |                 | ORF        | E | NS5      |                                |
| CxFV           | Aug-2006     | Dongming, Shandong Province | <i>Culex pipiens</i>         | SDDM06-11       | JQ518484   |   |          | Wang <i>et al.</i> , 2012 [1]  |
| YNCxFV         | Jul-2009     | Lushui, Yunnan Province     | <i>Cx. tritaeniorhynchus</i> | LSFlaviV-A20-09 | KC464457   |   |          |                                |
| YNCxFV         | Jun-2009     | Nanjian, Yunnan Province    | <i>Cx. tritaeniorhynchus</i> | YNCxFV-NJ6-09   |            |   | KC510663 |                                |
| YNCxFV         | Jun-2009     | Nanjian, Yunnan Province    | <i>Cx. tritaeniorhynchus</i> | YNCxFV-NJ5-09   |            |   | KC510664 |                                |
| YNCxFV         | Jun-2009     | Zhenyuan, Yunnan Province   | <i>Anopheles sinensis</i>    | YNCxFV-A125-09  |            |   | KC510665 |                                |
| YNCxFV         | Jun-2009     | Heqing, Yunnan Province     | <i>Cx. tritaeniorhynchus</i> | YNCxFV-A118-09  |            |   | KC510666 |                                |
| YNCxFV         | Aug-2009     | Malipo, Yunnan Province     | <i>Cx. tritaeniorhynchus</i> | YNCxFV-A55-09   |            |   | KC510668 | Zuo <i>et al.</i> , 2014 [2]   |
| YNCxFV         | Jul-2009     | Mengla, Yunnan Province     | <i>Cx. tritaeniorhynchus</i> | YNCxFV-A50-09   |            |   | KC510669 |                                |
| YNCxFV         | Jun-2009     | Lushui, Yunnan Province     | <i>Cx. tritaeniorhynchus</i> | YNCxFV-A11-09   |            |   | KC510670 |                                |
| YNCxFV         | Jul-2009     | Lushui, Yunnan Province     | <i>Cx. tritaeniorhynchus</i> | YNCxFV-A12-09   |            |   | KC510671 |                                |
| YNCxFV         | Jul-2009     | Lushui, Yunnan Province     | <i>Cx. tritaeniorhynchus</i> | YNCxFV-A26--09  |            |   | KC510672 |                                |
| YNCxFV         | Jun-2009     | Ninger, Yunnan Province     | <i>Cx. tritaeniorhynchus</i> | YNCxFV-A39-09   |            |   | KC510673 |                                |
| CxFV           | Jul-2004     | Tanghe, Henan Province      | <i>Cx. spp.</i>              | HNTH04-02       |            |   |          |                                |
| CxFV           | Jul-2004     | Tanghe, Henan Province      | <i>Cx. spp.</i>              | HNTH04-03       |            |   |          |                                |
| CxFV           | Jul-2004     | Tanghe, Henan Province      | <i>Cx. spp.</i>              | HNTH04-12       |            |   |          |                                |
| CxFV           | Jul-2004     | Tanghe, Henan Province      | <i>Cx. spp.</i>              | HNTH04-17       |            |   |          |                                |
| CxFV           | Jul-2004     | Tanghe, Henan Province      | <i>Cx. spp.</i>              | HNTH04-19       |            |   |          |                                |
| CxFV           | Jul-2004     | Tanghe, Henan Province      | <i>Cx. spp.</i>              | HNTH04-20       |            |   |          | Liang <i>et al.</i> , 2015 [3] |
| CxFV           | Jul-2004     | Tanghe, Henan Province      | <i>Cx. spp.</i>              | HNTH04-26       |            |   |          |                                |
| CxFV           | Jul-2004     | Tanghe, Henan Province      | <i>Cx. spp.</i>              | HNTH04-28       |            |   |          |                                |
| CxFV           | Jul-2004     | Tanghe, Henan Province      | <i>Cx. spp.</i>              | HNTH04-36       |            |   |          |                                |
| CxFV           | Jul-2004     | Tanghe, Henan Province      | <i>Cx. spp.</i>              | HNTH04-37       |            |   |          |                                |
| CxFV           | Jul-2004     | Tanghe, Henan Province      | <i>Cx. spp.</i>              | HNTH04-41       |            |   |          |                                |

|      |          |                             |                               |              |                                |
|------|----------|-----------------------------|-------------------------------|--------------|--------------------------------|
| CxFV | Jul-2004 | Tanghe, Henan Province      | <i>Cx. spp.</i>               | HNTH04-42    |                                |
| CxFV | Aug-2009 | Jiaozhou, Shandong Province | <i>Cx. pipiens</i>            | SDJZ09-1     |                                |
| CxFV | Aug-2009 | Longkou, Shandong Province  | <i>Anopheles sinensis</i>     | SDLK09-24    |                                |
| CxFV | Aug-2012 | Rizhao, Shandong Province   | <i>Cx. pipiens</i>            | SDRZ12-40    |                                |
| CxFV | Aug-2012 | Rizhao, Shandong Province   | <i>Cx. pipiens</i>            | SDRZ12-44    |                                |
| CxFV | Aug-2012 | Rizhao, Shandong Province   | <i>Cx. pipiens</i>            | SDRZ12-50    |                                |
| CxFV | Aug-2012 | Rizhao, Shandong Province   | <i>Cx. pipiens</i>            | SDRZ12-66    |                                |
| CxFV | Aug-2012 | Junan, Shandong Province    | <i>Cx.. tritaeniorhynchus</i> | SDJN12-05    |                                |
| CxFV | Aug-2012 | Junan, Shandong Province    | <i>Cx. pipiens</i>            | SDJN12-19    |                                |
| CxFV | Aug-2012 | Junan, Shandong Province    | <i>Cx.. tritaeniorhynchus</i> | SDJN12-10    | Liang <i>et al.</i> , 2015 [3] |
| CxFV | Aug-2012 | Weishan, Shandong Province  | <i>Cx.. tritaeniorhynchus</i> | SDJN12-04    |                                |
| CxFV | Jul-2012 | Yanan, Shanxi Province      | <i>Cx. pipiens</i>            | SXYA12-27-2  |                                |
| CxFV | Jul-2012 | Yanan, Shanxi Province      | <i>Cx. pipiens</i>            | SXYA12-27-4  |                                |
| CxFV | Jul-2012 | Yanan, Shanxi Province      | <i>An. sinensis</i>           | SXYA12-27-8  |                                |
| CxFV | Jul-2012 | Yanan, Shanxi Province      | <i>Cx. pipiens</i>            | SXYA12-28-4  |                                |
| CxFV | Jul-2012 | Yanan, Shanxi Province      | <i>Cx. pipiens</i>            | SXYA12-28-6  |                                |
| CxFV | Jul-2012 | Yanan, Shanxi Province      | <i>Cx. pipiens</i>            | SXYA12-28-8  |                                |
| CxFV | Jul-2012 | Yanan, Shanxi Province      | <i>Cx. pipiens</i>            | SXYA12-28-10 |                                |
| CxFV | Aug-2011 | Gansu Province              | <i>Cx. pipiens</i>            | GS11-21      |                                |
| CxFV | Aug-2011 | Gansu Province              | <i>Cx. pipiens</i>            | GS11-38      |                                |
| CxFV | Aug-2011 | Gansu Province              | <i>Cx. pipiens</i>            | GS11-41      |                                |
| CxFV | Aug-2011 | Gansu Province              | <i>Cx. pipiens</i>            | GS11-169     |                                |
| CxFV | Aug-2011 | Gansu Province              | <i>Cx. pipiens</i>            | GS11-170     | Zha <i>et al.</i> , 2012 [4]   |
| CxFV | Aug-2011 | Gansu Province              | <i>Cx. pipiens</i>            | GS11-171     |                                |
| CxFV | Aug-2011 | Gansu Province              | <i>Cx. pipiens</i>            | GS11-172     |                                |
| CxFV | Aug-2011 | Gansu Province              | <i>Cx. pipiens</i>            | GS11-173     |                                |

|      |          |                            |                              |          |          |                               |
|------|----------|----------------------------|------------------------------|----------|----------|-------------------------------|
| CxFV | Aug-2011 | Gansu Province             | <i>Cx. pipiens</i>           | GS11-174 |          |                               |
| CxFV | Aug-2011 | Gansu Province             | <i>Cx. pipiens</i>           | GS11-175 |          |                               |
| CxFV | Aug-2011 | Gansu Province             | <i>Cx. pipiens</i>           | GS11-176 |          |                               |
| CxFV | Aug-2011 | Gansu Province             | <i>Cx. pipiens</i>           | GS11-177 |          |                               |
| CxFV | Aug-2011 | Gansu Province             | <i>Cx. pipiens</i>           | GS11-178 |          |                               |
| CxFV | Aug-2011 | Gansu Province             | <i>Cx. pipiens</i>           | GS11-179 |          |                               |
| CxFV | Aug-2011 | Gansu Province             | <i>Cx. pipiens</i>           | GS11-180 |          | Zha <i>et al.</i> , 2012 [4]  |
| CxFV | Aug-2011 | Gansu Province             | <i>Cx. pipiens</i>           | GS11-181 |          |                               |
| CxFV | Aug-2011 | Gansu Province             | <i>Cx. pipiens</i>           | GS11-182 |          |                               |
| CxFV | Aug-2011 | Gansu Province             | <i>Cx. pipiens</i>           | GS11-183 |          |                               |
| CxFV | Aug-2011 | Gansu Province             | <i>Cx. pipiens</i>           | GS11-184 |          |                               |
| CxFV | Aug-2011 | Gansu Province             | <i>Cx. pipiens</i>           | GS11-185 |          |                               |
| CxFV | Aug-2011 | Gansu Province             | <i>Cx. pipiens</i>           | GS11-186 |          |                               |
| CxFV | Sep-2011 | Dandong, Liaoning Province | <i>Cx. pipiens</i>           | DG1      | JQ065883 | JQ409188                      |
| CxFV | Sep-2011 | Dandong, Liaoning Province | <i>Cx. pipiens</i>           | DG2      | JQ065882 | JQ409186                      |
| CxFV | Sep-2011 | Dandong, Liaoning Province | <i>Cx. pipiens</i>           | DG3      | JQ065881 | JQ409187                      |
| CxFV | Sep-2011 | Dandong, Liaoning Province | <i>Cx. pipiens</i>           | DG5      | JQ065879 | JQ409191                      |
| CxFV | Sep-2011 | Dandong, Liaoning Province | <i>Cx. pipiens</i>           | DG6      | JQ065877 | JQ409189                      |
| CxFV | Sep-2011 | Dandong, Liaoning Province | <i>Cx. pipiens</i>           | DG7      | JQ065878 | JQ409190                      |
| QBV  | Jul-2012 | Menghai, Yunnan Province   | <i>Cx. tritaeniorhynchus</i> | BNDL1205 |          |                               |
| QBV  | Jul-2012 | Menghai, Yunnan Province   | <i>Cx. tritaeniorhynchus</i> | BNDL1227 |          | Feng <i>et al.</i> , 2014 [6] |

YNCxFV, Yunnan Culex flavivirus; CxFV, Culex flavivirus; QBV, Quang Binh virus; ORF: open reading frame; E: envelope gene; NS5: non-structural 5 gene.

## References

1. Wang H, Wang H, Fu S, Liu G, Liu H, Gao X-Y, et al. Isolation and identification of a distinct strain of Culex flavivirus from mosquitoes collected in Mainland China. *Virology* 2012;9:73-73.
2. Zuo S, Zhao Q, Guo X, Zhou H, Cao W, Zhang J-S. Detection of Quang Binh virus from mosquitoes in China. *Virus Res* 2014;180:31-38.

3. Liang W, He X, Liu G, Zhang S, Fu S, Wang M, *et al.* Distribution and phylogenetic analysis of Culex flavivirus in mosquitoes in China. Arch Virol 2015;160:2259-2268.
4. Zha B, Yu D-S, Fu S-H, Li G-T, Lv Z, Jiang J-X, *et al.* [Investigation of mosquitoes and arboviruses in Hexi Corridor of Gansu province, China in 2011]. Chin J Vector Biol Control 2012;23:424-427. (In Chinese)
5. An S-Y, Liu J-S, Ren Y, Wang Z-S, Han Y, Ding J, *et al.* [Isolation fo the Culex flavivirus from mosquitoes in Liaoning Province, China]. Chin J Virol 2012;28:511-516. (In Chinese)
6. Feng Y, H.-B. L, J. Z, Zhang Y-Z, Yang W-H, Fan W-H, *et al.* [First isolation of Quang Binh-like virus from mosquitoes in China]. Chin J Virol 2014:57-61. (In Chinese)
